# Supplementary material for: R-Loop–Mediated ssDNA Breaks Accumulate Following Short-Term Exposure to the HDAC Inhibitor Romidepsin
Source: PubMed Central journal article supplement — Mol Cancer Res. 2021 May 28;19(8):1361–74. doi: 10.1158/1541-7786.MCR-20-0833 (PMC8974437; doi:10.1158/1541-7786.mcr-20-0833), 2021-05-28

# Supplementary Figure 1

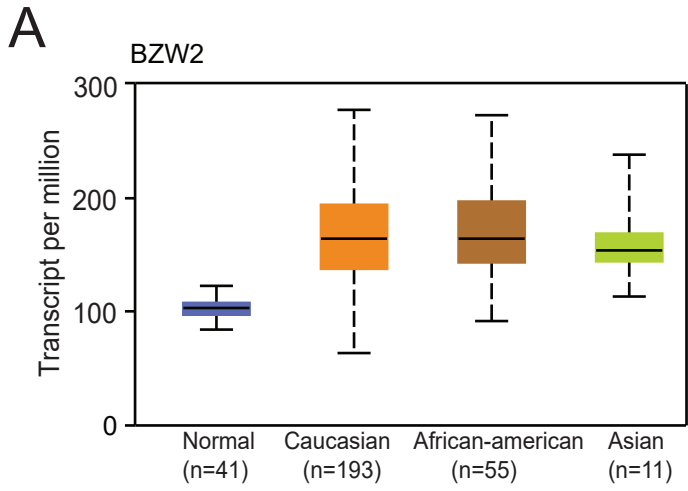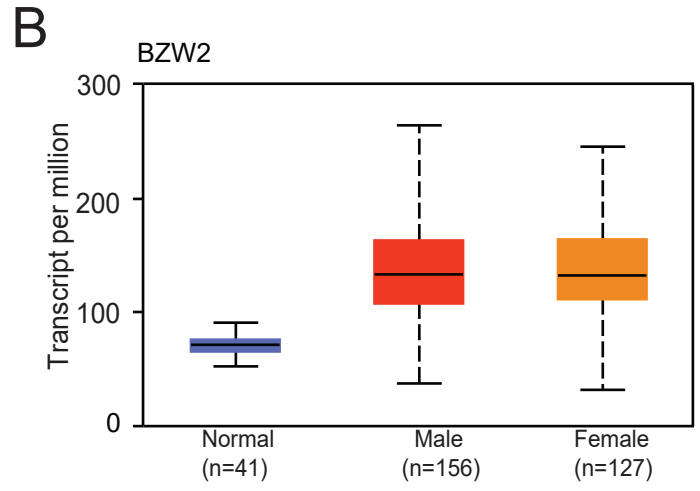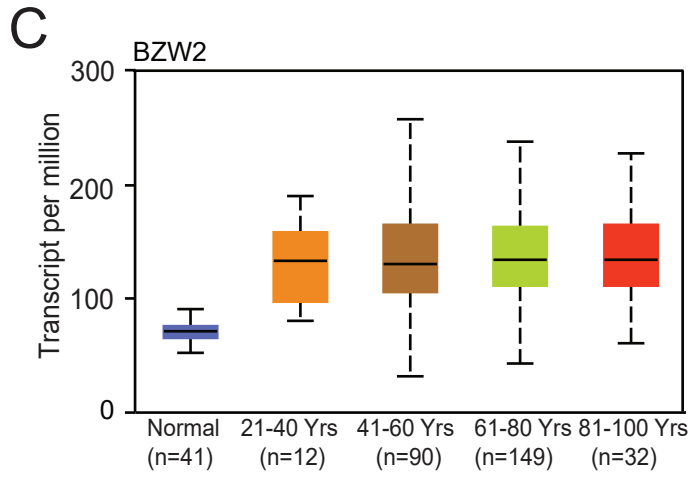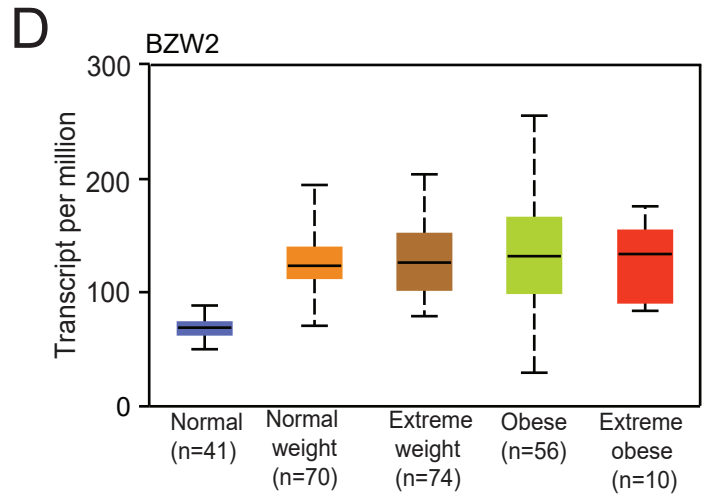

# Supplementary Figure 2

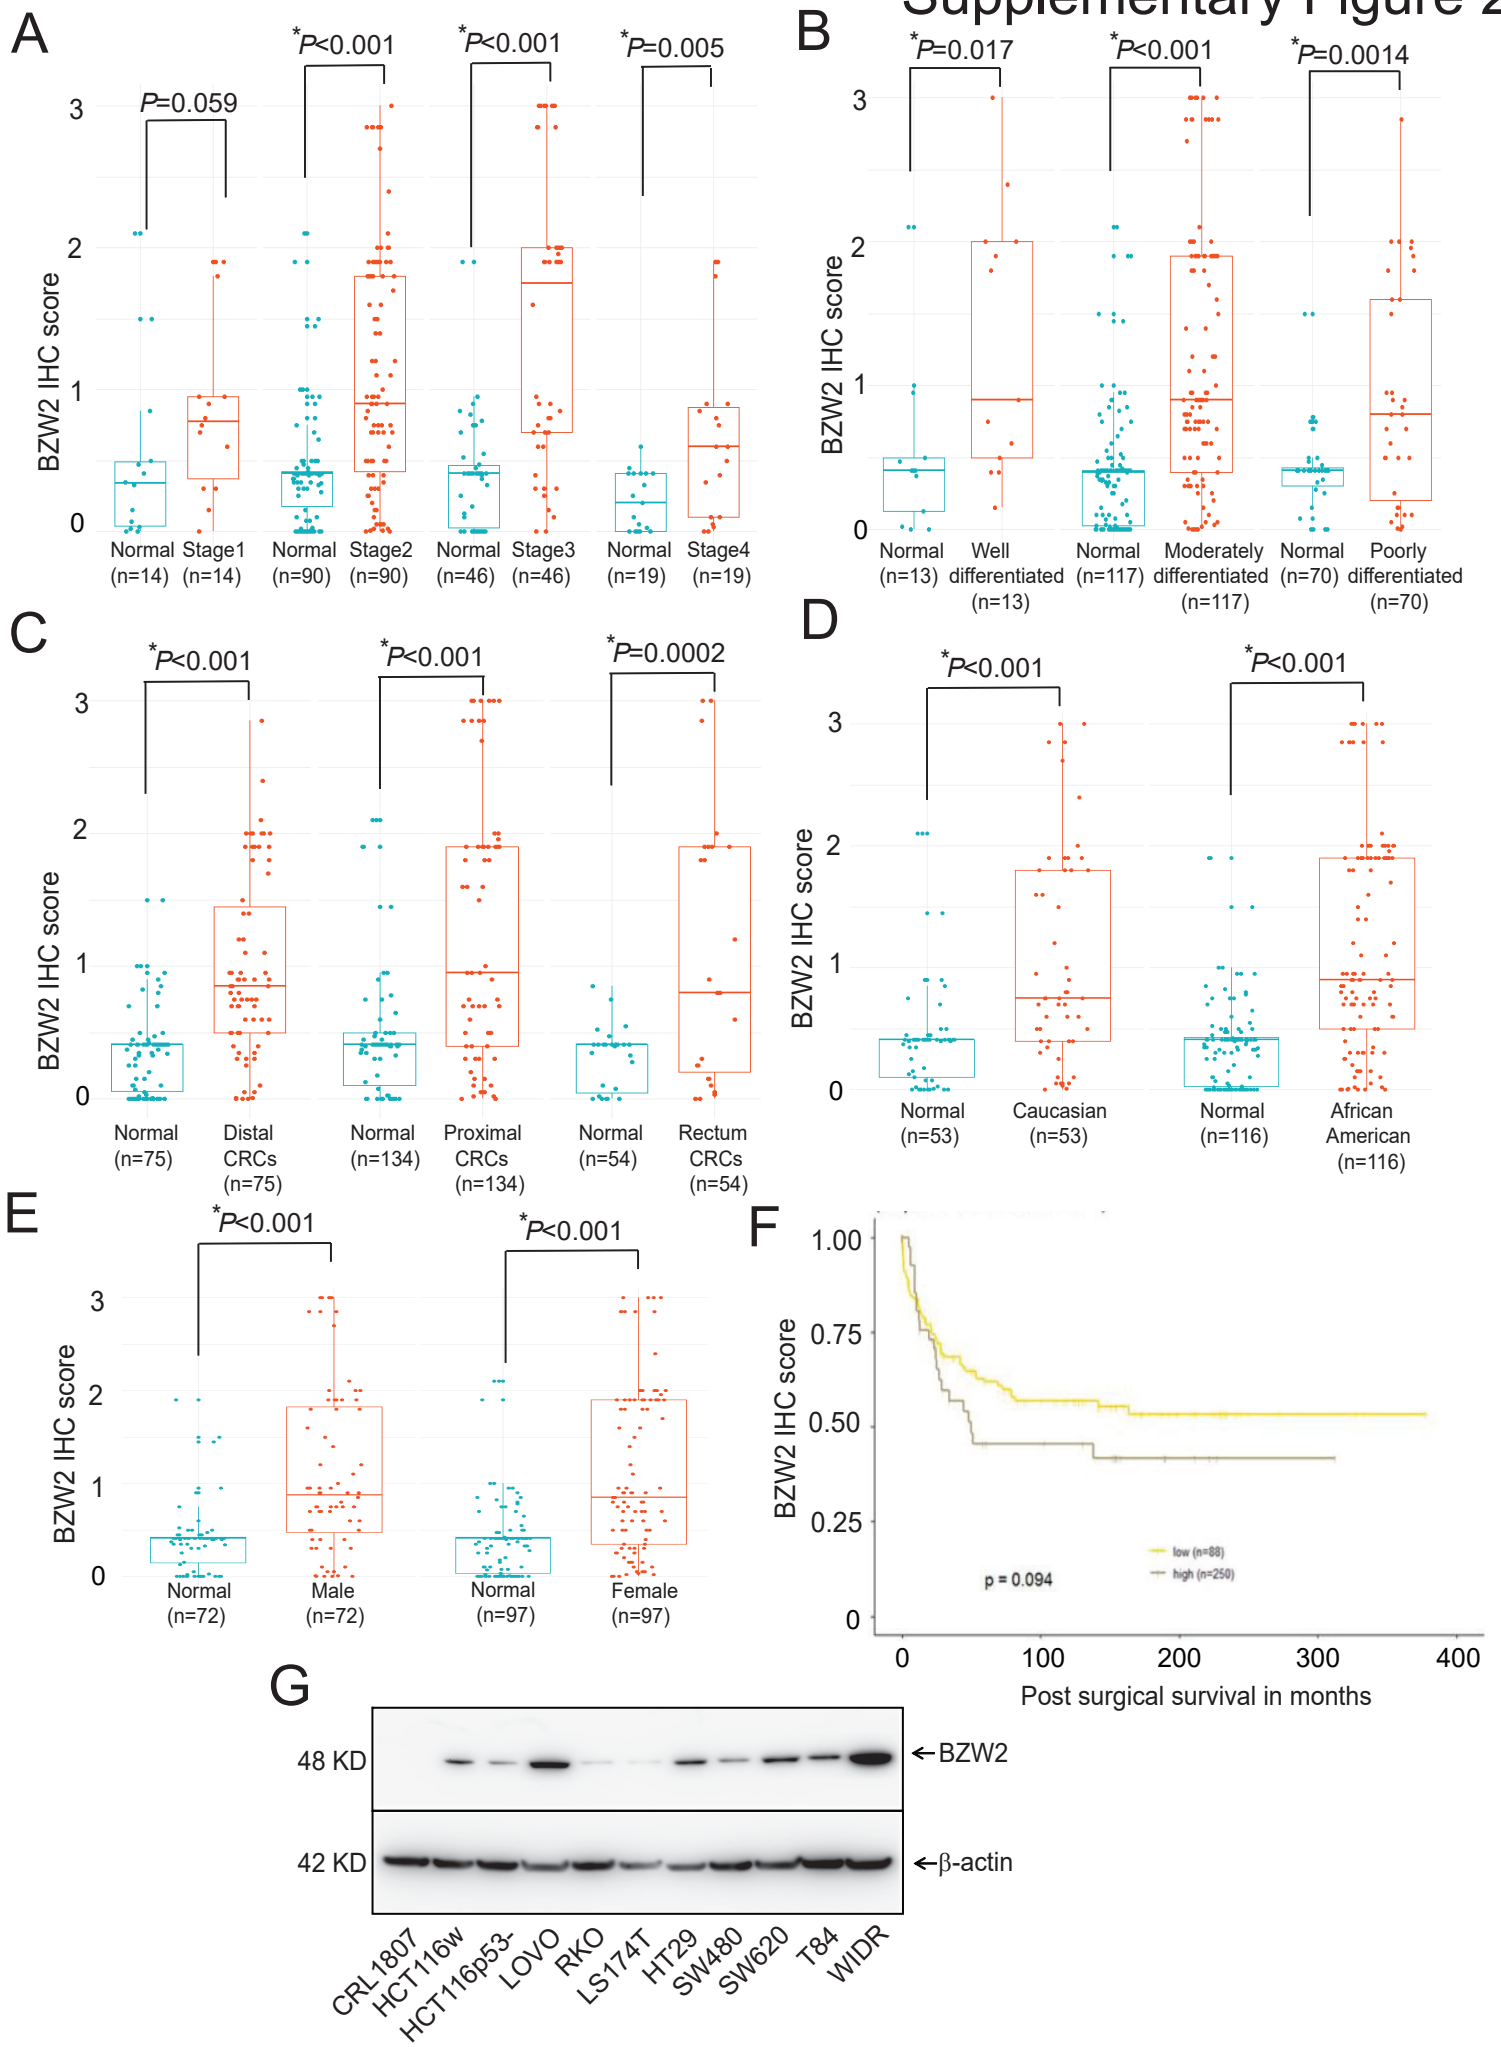

# Supplementary Figure 3

A

|        | p53     | KRAS    | MS  | BRAF    | EGFR IHC  |
|--------|---------|---------|-----|---------|-----------|
| HCT116 | Wild    | Mutated | MSI | Mutated | Wild (+)  |
| SW480  | Mutated | Mutated | MSS | Mutated | Wild (-)  |
| HT29   | Mutated | Wild    | MSS | Wild    | Wild (++) |
| RKO    | Wild    | Wild    | MSS | Wild    | Wild (-)  |

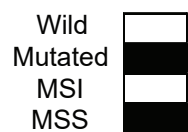

B

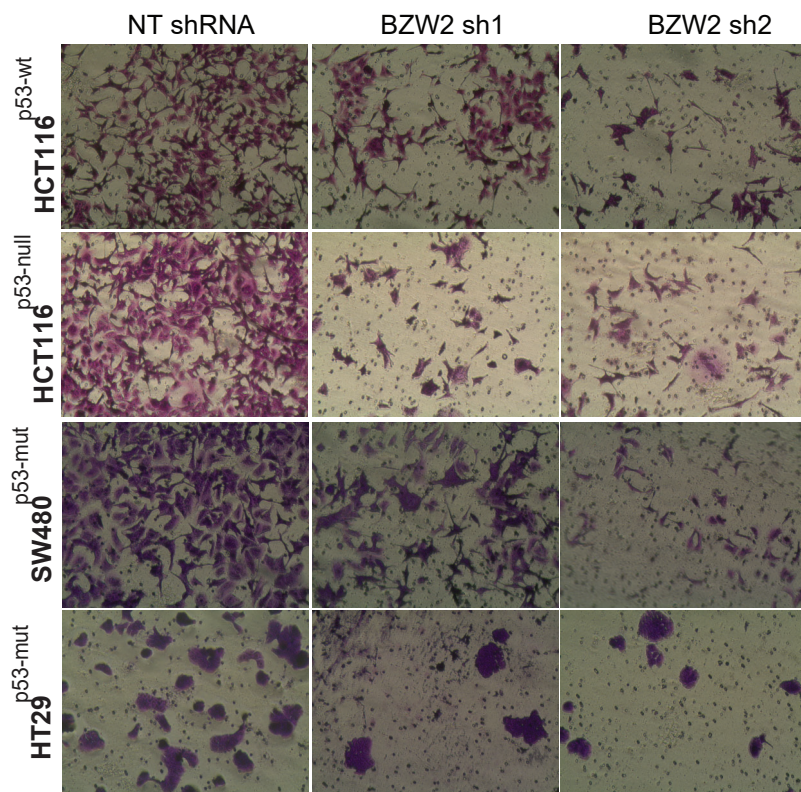

# Supplementary Figure 4

A

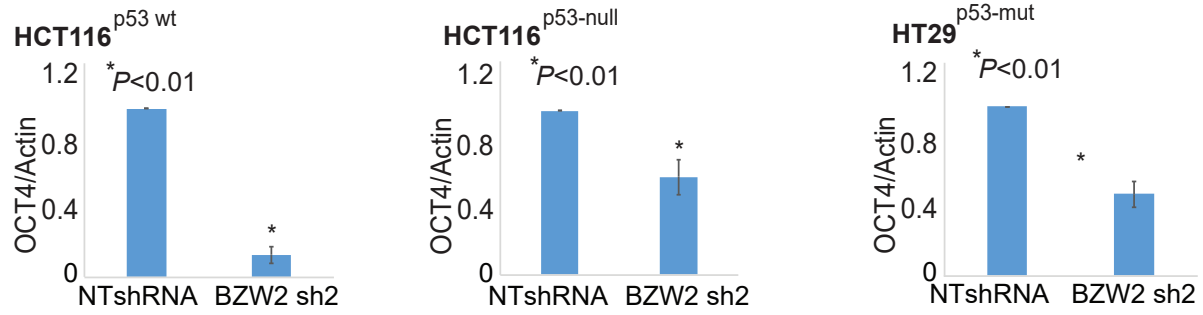

B

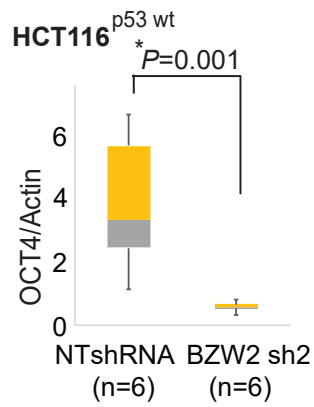

C

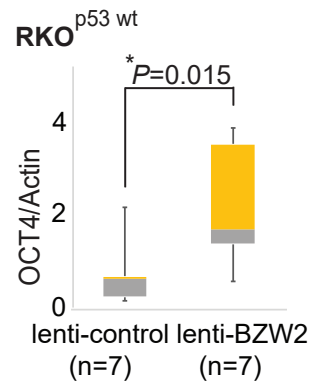

# Supplementary Figure 5

A

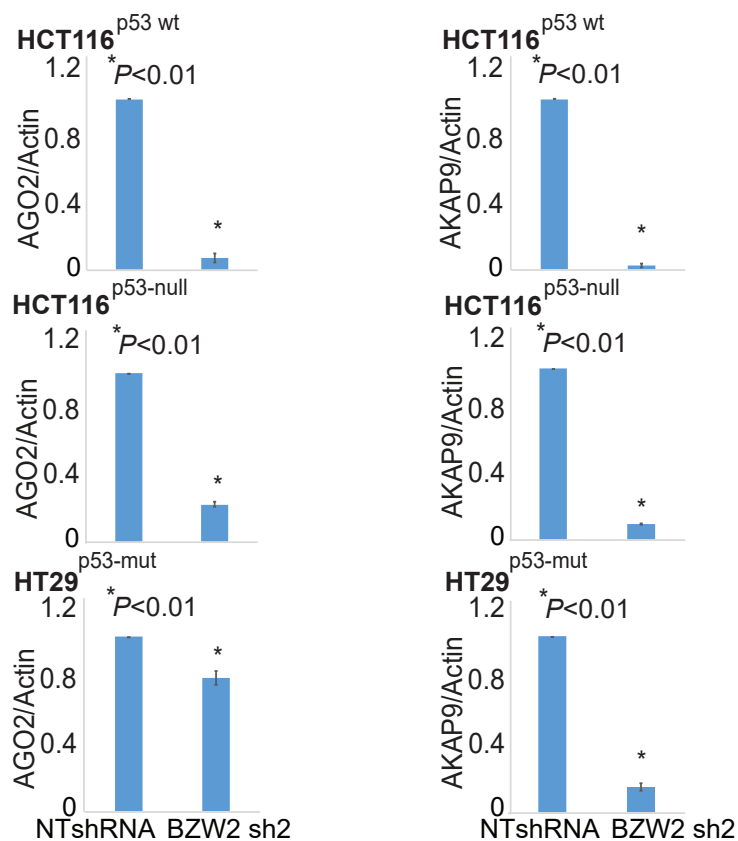

B

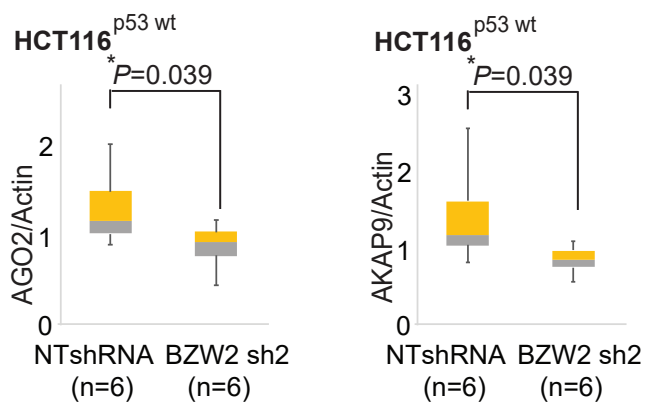

C

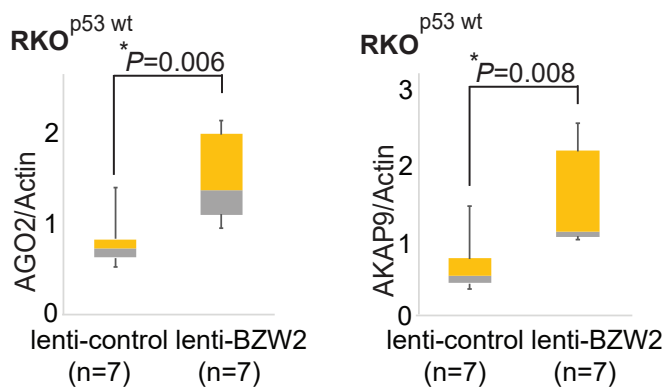

# Supplementary Figure 6

## A

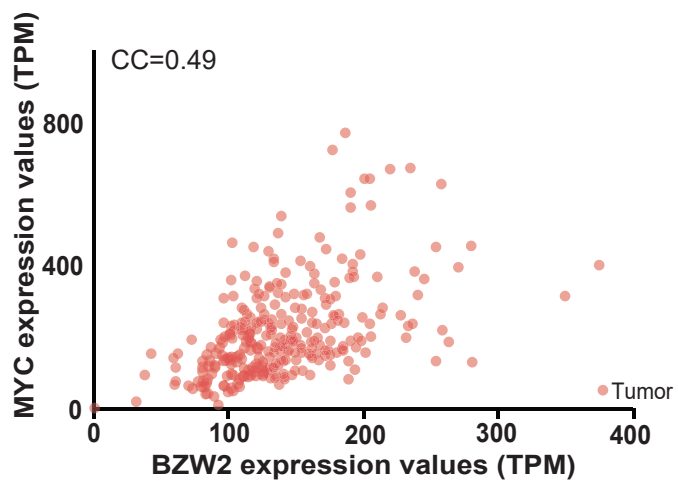

## B

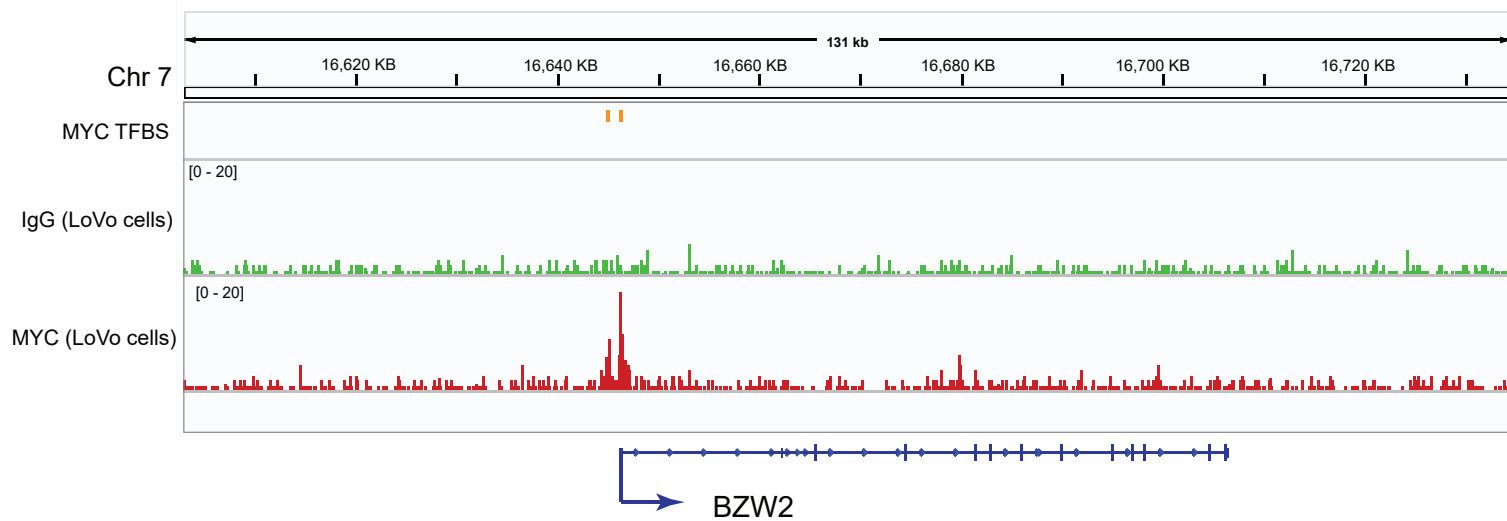

# Supplementary Figure 7

**A**

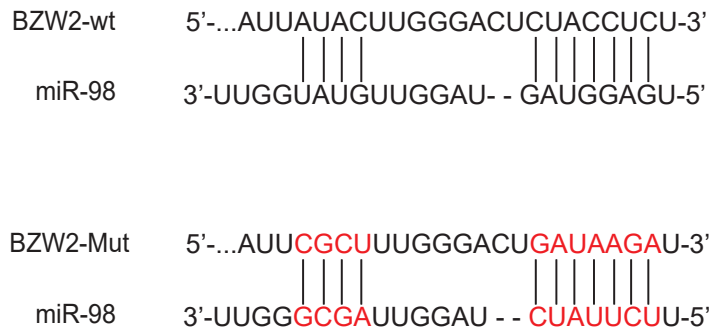

**B**

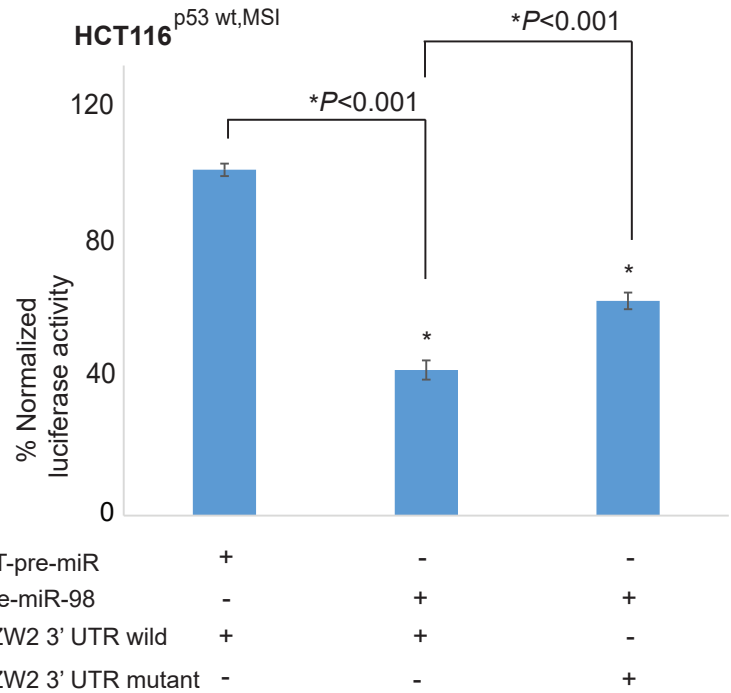

**C**

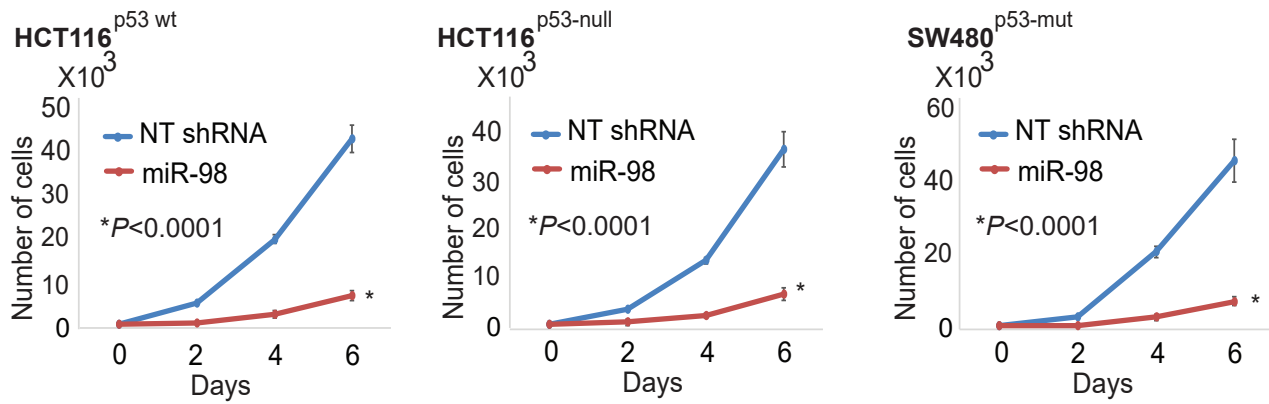

**D**

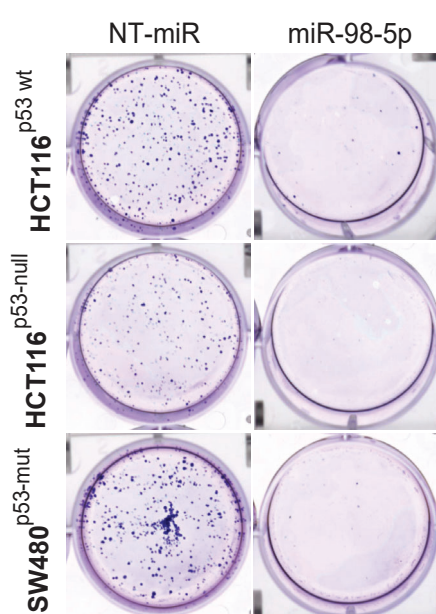

**E**

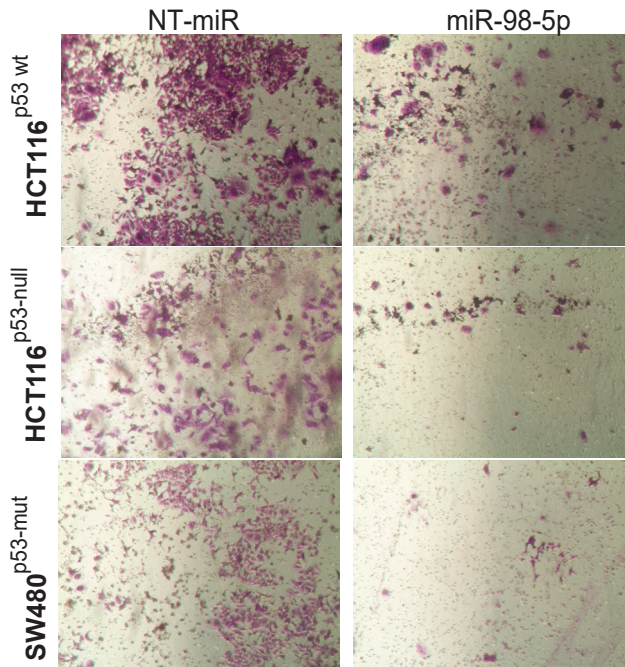

# Supplementary Figure 8

## A

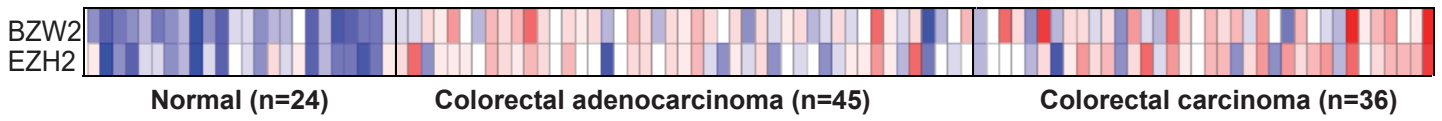

## B

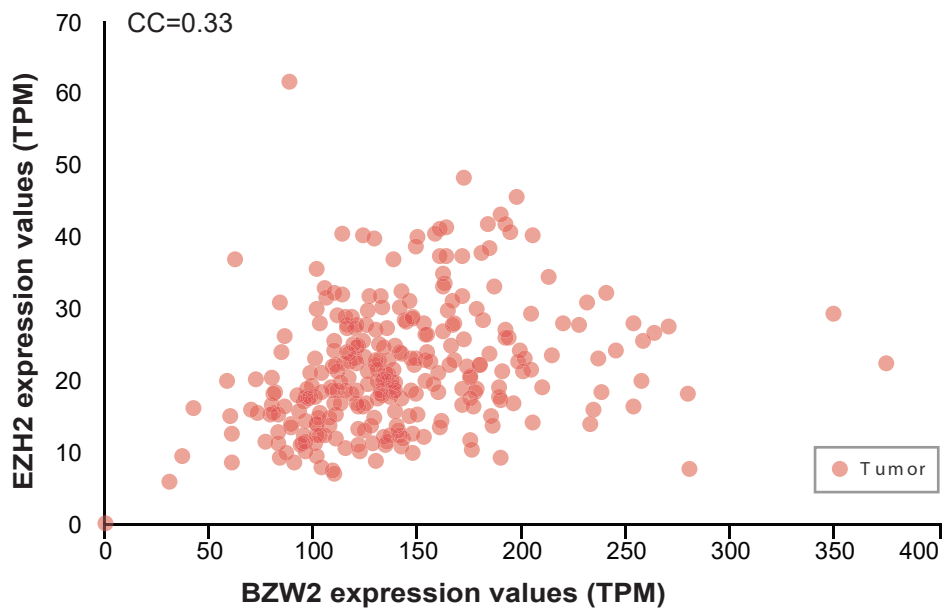

Supplement: molcanres-19-1361-s001.pdf [file molcanres-19-1361-s001.pdf]
